# Supplementary material for: Owner personality and the wellbeing of their cats share parallels with the parent-child relationship
Source: PLoS One. 2019 Feb 5;14(2):e0211862. doi: 10.1371/journal.pone.0211862 (PMC6363285; doi:10.1371/journal.pone.0211862)
Supplement: S6 Appendix — (DOCX) [file pone.0211862.s006.docx]

## Sheet: Sheet1
Model	Coefficients from summary of minimum adequate models:	Estimate	Standard error	z value	p
GLM with sickness behaviour score as the response variable and age and medical condition as the explanatories	Intercept	3.1447
	age	-0.0059204	0.0008306	-7.128	p<0.0001
	Existing medical condition	-0.0496906	0.0095703	-5.192	p<0.0001
GLM with existing medical condition as the response variable with age and breed as the explanatories	Intercept (medical condition)	-2.4432
	age	0.151036	0.008929	16.91	p<0.0001
	Breed (pedigree)	0.242626	0.113386	2.14	P<0.05
GLM with house soiling score as the response variable and age, existing medical and breed as the explanatories	Intercept	2.66676
	Age	-0.0038722	0.0009852	-3.93	p<0.0001
GLMM with sickness behaviour score as the response variable, age and exisitng medical as covariates and outdoor access as the explanatory	Intercept	3.08298
	indoors	-0.020531	0.010361	-1.981	p<0.05
	restricted outdoor access	-0.019714	0.009049	-2.213	p<0.05
GLM with outdoor access type (indoors or unrestricted) as the response variable and breed as the explanatory	Intercept	0.33045
	Breed (pedigree)	-1.29553	0.13631	-9.504	p<0.0001
GLM with outdoor access type (indoors or restricted) as the response variable and breed as the explanatory	Intercept	0.69231
	Breed (pedigree)	-0.6794	0.10547	-6.442	p<0.0001
GLM with outdoor access type (restricted or unrestricted) as the response variable and breed as the explanatory	Intercept	-0.36185
	Breed (pedigree)	-0.61613	0.13299	-4.633	p<0.0001
GLM with weight category (under or overweight) as the response variable and outdoor access as the explanatory	Intercept	-0.03922
	Breed (pedigree)	1.18892	0.21797	5.454	p<0.0001
GLMM with presence of exisitng medical condition as the response variable with age included as a covariate and owner personality traits as the explanatories	Intercept	-1.35486
	Neuroticism score	0.026745	0.006716	3.982	p<0.0001
GLMM with sickness behaviour score the response variable and cat's age, outdoor access type and presence of an exisiting medical condition included as covariates and owner personality traits included as the explanatories	Intercept	3.06926
	Neuroticism score	-0.008359	0.003813	-2.692	P<0.01
GLMM with weight category (Overweight or normal weight) with breed included as a covariate and owner personality traits included as the explanatories	Intercept	-1.24121
	Neuroticism score	0.02176	0.007691	2.829	p<0.01
	Agreeableness score	-0.030289	0.009199	-3.293	p<0.001
GLMM with weight category (Underweight or normal weight) with breed included as a covariate and owner personality traits included as the explanatories	Intercept	-1.56071
	Agreeableness score	-0.04926	0.01317	-3.741	p<0.001
	Extroversion score	0.0329	0.01558	2.112	P<0.05
GLM with 'Gregariousness' PC score as the response variable and breed as the explanatory	Intercept	3.61718
	Breed (pedigree)	0.083565	0.007413	11.27	p<0.0001
GLM with 'Aggressiveness' PC score as the response variable and breed as the explanatory	Intercept	2.4457
	Breed (pedigree)	-0.11671	0.01447	-8.067	p<0.0001
GLM with 'Aloof/avoidant' PC score as the response variable and breed as the explanatory	Intercept	2.73837
	Breed (pedigree)	-0.09467	0.012383	-7.645	p<0.0001
GLM with 'Anxious/fearful' PC score as the response variable and breed as the explanatory	Intercept	2.78654
	Breed (pedigree)	-0.091226	0.01207	-7.558	p<0.0001
GLMM with 'Gregariousness' PC score as the response variable and breed as a covariate and owner personality traits included as the explanatories	Intercept	3.65648
	Extroversion score	0.007659	0.003354	2.283	p<0.00001
	Conscientiousness score	0.016844	0.003268	5.154	p<0.00001
	Openness score	0.015439	0.00303	5.095	p<0.00001
GLMM with 'Aggressiveness' PC score as the response variable and breed as a covariate and owner personality traits included as the explanatories	Intercept	2.3899
	Neuroticism score	0.013543	0.005949	2.277	P<0.05
	Agreeable score	-0.020032	0.005714	-3.506	p<0.0001
	Conscientiousness score	-0.015585	0.005786	-2.693	p<0.001
	Openness score	-0.011445	0.005451	-2.1	p<0.05
GLMM with 'Aloof/avoidant' PC score as the response variable and breed as a covariate and owner personality traits included as the explanatories	Intercept	2.69302
	Agreeable score	-0.021835	0.004787	-4.561	p<0.0001
	Conscientiousness score	-0.024301	0.0048	-5.062	p<0.0001
	Openness score	-0.019515	0.004648	-4.199	p<0.0001
GLMM with 'Anxious/fearful' PC score as the response variable and breed as a covariate and owner personality traits included as the explanatories	Intercept	2.7435
	Neuroticism score	0.015588	0.004788	3.256	p<0.01
	Conscientiousness score	-0.014041	0.004759	-2.951	p<0.01
GLM with behaviour problem as the response variable and owner personality traits included as the explanatories	Intercept	-1.79715
	Neuroticism score	0.016064	0.006741	2.383	p<0.05
GLM with number of cats owned as the response variable and owner personality traits included as the explanatories	Intercept	0.569651
	Neuroticism score	-0.007481	0.002691	-2.78	p<0.01
	Agreeable score	-0.007343	0.002992	-2.454	p<0.05
	Conscientiousness score	0.017272	0.004617	3.741	p<0.001
	Openness score	0.007313	0.002739	2.67	p<0.01
	Extroversion score	-0.02588	0.003796	-6.817	p<0.0001
GLM with breed (pedigree or non-pedigree)as the response variable and owner personality traits included as the explanatories	Intercept	-0.757941
	Neuroticism score	-0.033612	0.007055	-4.764	p<0.0001
GLMM with outdoor access (unrestricted or strictly indoors) as the response variable, breed a covariate and owner personality traits included as the explanatories	Intercept	-0.180968
	Neuroticism score	0.053809	0.008482	-2.871	p<0.001
	Openness score	-0.024351	0.009004	-2.783	p<0.001
	Extroversion score	-0.025059	0.012116	4.4418	p<0.0001
GLMM with outdoor access (unrestricted or restricted) as the response variable, breed as a covariate and owner personality traits as the explanatories	Intercept	0.568681
	Neuroticism score	-0.022206	0.006935	-3.202	p<0.05
	Agreeable score	-0.020193	0.008331	-2.424	p<0.05
GLMM with outdoor access (restricted or strictly indoors) as the response variable and breed a covariate and owner personality traits as the explanatories	Intercept	-0.87807
	Extroversion score	0.04826	0.00907	5.321	p<0.0001
GLM with owner satisfaction as the response variable and and owner personality traits as the explanatories	Intercept	2.57593
	Agreeable score	0.002053	0.00087	2.359	p<0.05
